# Supplementary material for: A single-component white-light-emitting fluorescent material with high color rendering index based on resonance energy transfer
Source: Royal Society of Chemistry journal article supplement (doi:10.1039/d2tc01698b), 2022-01-01
Supplement: d2tc01698b1.pdf [file d2tc01698b1.pdf]

**A single-component white-light-emitting fluorescent material  
with high color rendering index based on resonance energy  
transfer**

Ci'an Xie,<sup>a</sup> Zekun Wang,<sup>a</sup> Haojun Yu,<sup>a</sup> Juyu Yang,<sup>a</sup> Yan-gai Liu,<sup>\*a</sup> and  
Lefu Mei,<sup>\*a</sup>

*<sup>a</sup>Beijing Key Laboratory situ of Materials Utilization of Nonmetallic Minerals  
and Solid Wastes, National Laboratory of Mineral Materials, School of Materials  
Science and Technology, China University of Geosciences, 29 Xueyuan Road, Beijing,  
100083, China*

\*Corresponding authors:

E-mail: [liuyang@cugb.edu.cn](mailto:liuyang@cugb.edu.cn) (Yan-gai Liu)

E-mail: [mlf@cugb.edu.cn](mailto:mlf@cugb.edu.cn) (Lefu Mei)

**Table S1** XRD Rietveld refinements parameters for  $\text{Ca}_8\text{ZnGa}_{0.4}\text{La}_{0.6}(\text{PO}_4)_7: 0.003\text{Eu}^{2+}, 0.02\text{Mn}^{2+}$ .

| CZGL:0.003Eu <sup>2+</sup> ,0.02Mn <sup>2+</sup> |               |
|--------------------------------------------------|---------------|
| a=b (Å)                                          | 10.40355      |
| c (Å)                                            | 37.4514       |
| V (Å <sup>3</sup> )                              | 3510.44       |
| R <sub>p</sub> (%)                               | 4.55          |
| R <sub>wp</sub> (%)                              | 6.28          |
| Rexp(%)                                          | 3.38          |
| gof                                              | 1.85          |
| Space group                                      | R $\bar{3}$ c |
| crystal type                                     | trigonal      |

**Table S2** CIE values of  $\text{Ca}_8\text{ZnGa}_{0.4}\text{La}_{0.6}(\text{PO}_4)_7: 0.003\text{Eu}^{2+}, y\text{Mn}^{2+}$  solid solutions

| Mn <sup>2+</sup> amount (y) | CIE coordinates |        | Peak            |
|-----------------------------|-----------------|--------|-----------------|
|                             | x               | y      | Wavelength (nm) |
| 0                           | 0.2305          | 0.3269 | 490.0           |
| 0.008                       | 0.2608          | 0.2514 | 425.0           |
| 0.01                        | 0.2741          | 0.2579 | 424.2           |
| 0.02                        | 0.3093          | 0.2634 | 424.4           |
| 0.04                        | 0.3601          | 0.2670 | 631.2           |
| 0.05                        | 0.3814          | 0.2957 | 631.2           |
| 0.06                        | 0.3891          | 0.3053 | 630.2           |

**Table S3** CIE values of fabricated WLEDs at different currents.

| IF(mA) | CIE coordinates |        | Tc(K) | Ra   | Average wavelength<br>(nm) |
|--------|-----------------|--------|-------|------|----------------------------|
|        | x               | y      |       |      |                            |
| 60     | 0.3715          | 0.3504 | 4058  | 83.3 | 575                        |
| 120    | 0.3719          | 0.3622 | 4136  | 88.2 | 574.5                      |
| 180    | 0.3717          | 0.3705 | 4203  | 91.4 | 572.9                      |
| 240    | 0.3707          | 0.3752 | 4265  | 93.4 | 571.2                      |
| 300    | 0.3709          | 0.3780 | 4277  | 94.7 | 570.1                      |

**Table S4** The luminous efficacy of the fabricated WLEDs at different currents

| IF (mA) | luminous efficacy (lm/W) |
|---------|--------------------------|
| 60      | 1.11                     |
| 120     | 0.99                     |
| 180     | 0.91                     |
| 240     | 0.84                     |
| 300     | 0.79                     |

**Table S5** The R1-R15 values of the fabricated WLEDs

| IF (mA) | R1   | R2   | R3   | R4   | R5   | R6   | R7   | R8   | R9   | R10  | R11  | R12  | R13  | R14  | R15  |
|---------|------|------|------|------|------|------|------|------|------|------|------|------|------|------|------|
| 60      | 78.3 | 87.3 | 97   | 77.8 | 78   | 81.7 | 92.4 | 74.1 | 37.1 | 72.7 | 72.8 | 64.8 | 79.7 | 97.3 | 75.1 |
| 120     | 84.7 | 91.7 | 97.3 | 84.1 | 84.9 | 87.4 | 94   | 81.7 | 56.3 | 82   | 80.4 | 76.2 | 86   | 97.6 | 83.3 |
| 180     | 89   | 94.6 | 97.1 | 88.2 | 89.5 | 91.1 | 94.9 | 86.9 | 69.9 | 88.3 | 85.5 | 83.8 | 90.3 | 97.8 | 88.8 |
| 240     | 91.7 | 96.2 | 97.1 | 90.9 | 92.3 | 93   | 95.6 | 90.5 | 79.1 | 91.7 | 88.6 | 88.1 | 92.8 | 97.9 | 92.4 |
| 300     | 93.4 | 97.1 | 97.1 | 92.5 | 94.1 | 94.1 | 96.2 | 93.1 | 86   | 93.7 | 90.6 | 90.4 | 94.4 | 98.1 | 94.7 |

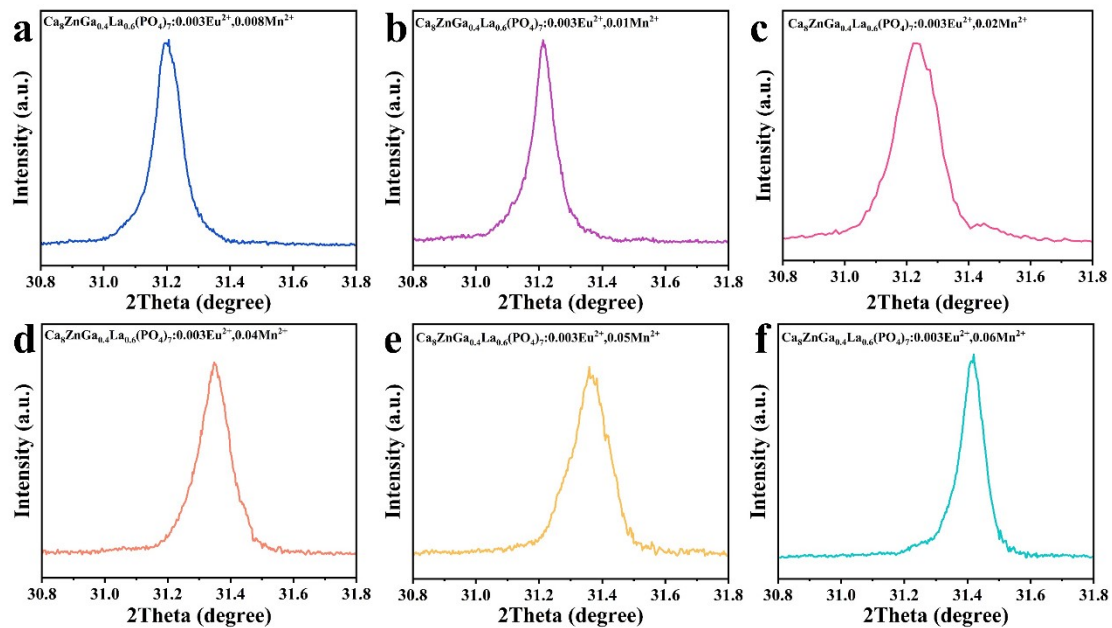

Figure S1. Higher precision XRD patterns of CZGL:  $0.003\text{Eu}^{2+}$ ,  $y\text{Mn}^{2+}$  in the range of  $30.8^\circ\sim 31.8^\circ$ .

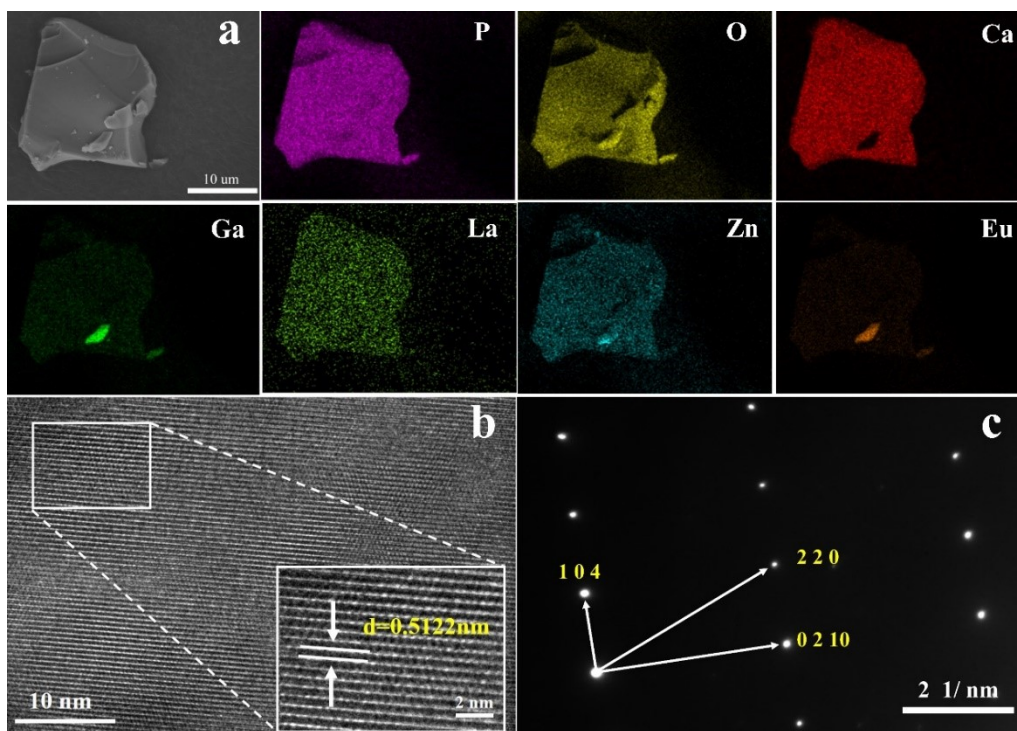

Figure S2. (a) SEM and elemental mapping patterns of CZGL:0.003Eu<sup>2+</sup>; (b) HRTEM image of CZGL:0.003Eu<sup>2+</sup> and (c) selected area electron diffraction pattern.

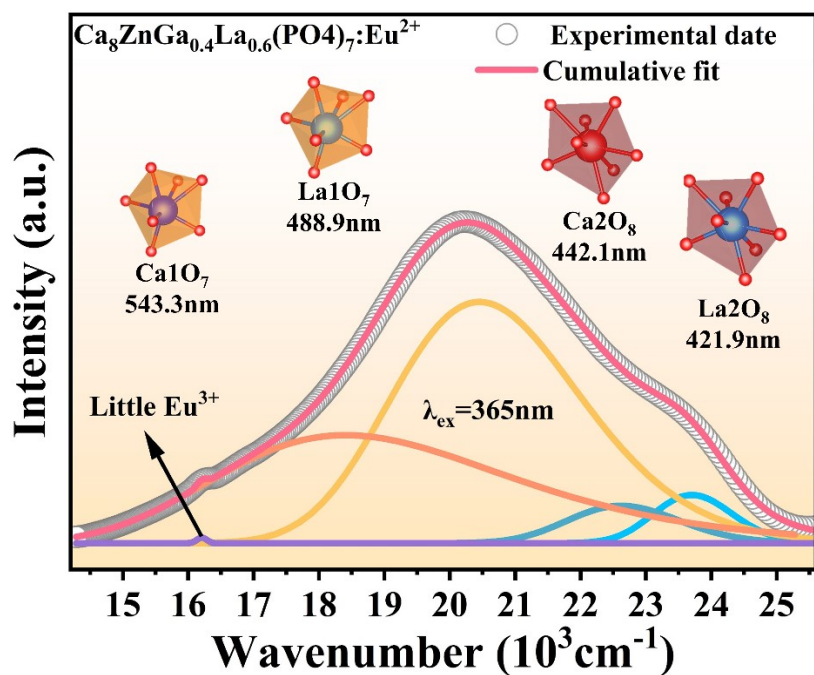

Figure S3. Gaussian fitting results of the PL peaks for  $\text{Eu}^{2+}$  doped  $\text{Ca}_8\text{ZnGa}_{0.4}\text{La}_{0.6}(\text{PO}_4)_7$ .

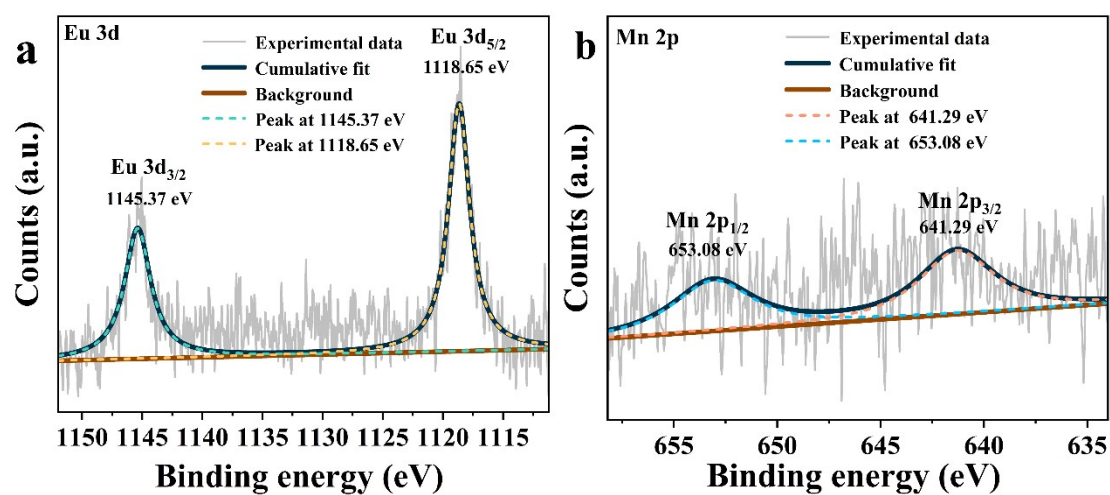

Figure S4. High-resolution XPS spectra at Eu 3d and Mn 2p position of CZGL:  $0.003\text{Eu}^{2+}$ ,  $0.02\text{Mn}^{2+}$  phosphors.

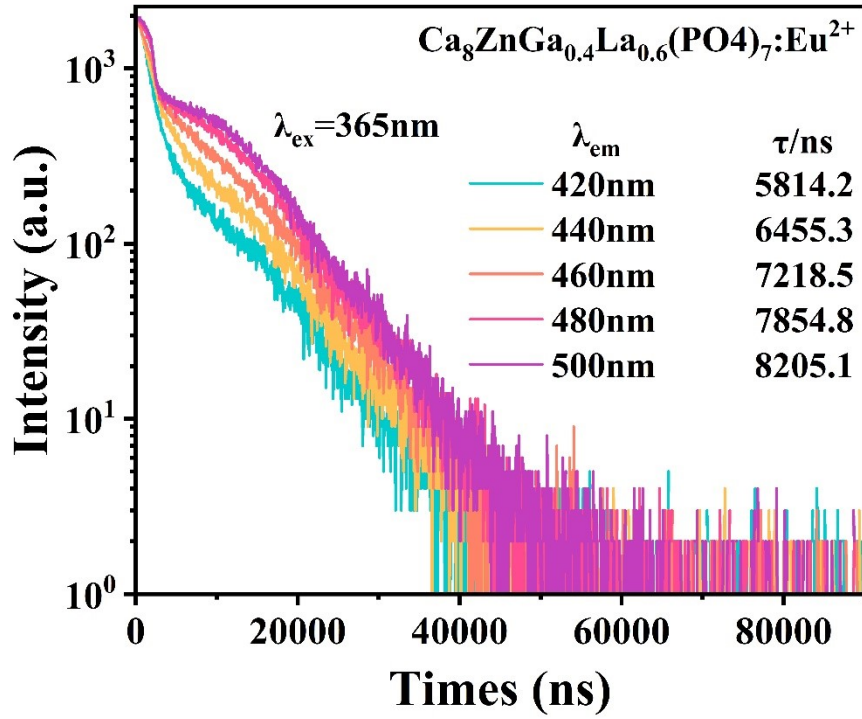

Figure S5. Wavelength-dependent PL decay curves of CZGL:  $\text{Eu}^{2+}$  by 365 nm excitation at room temperature.

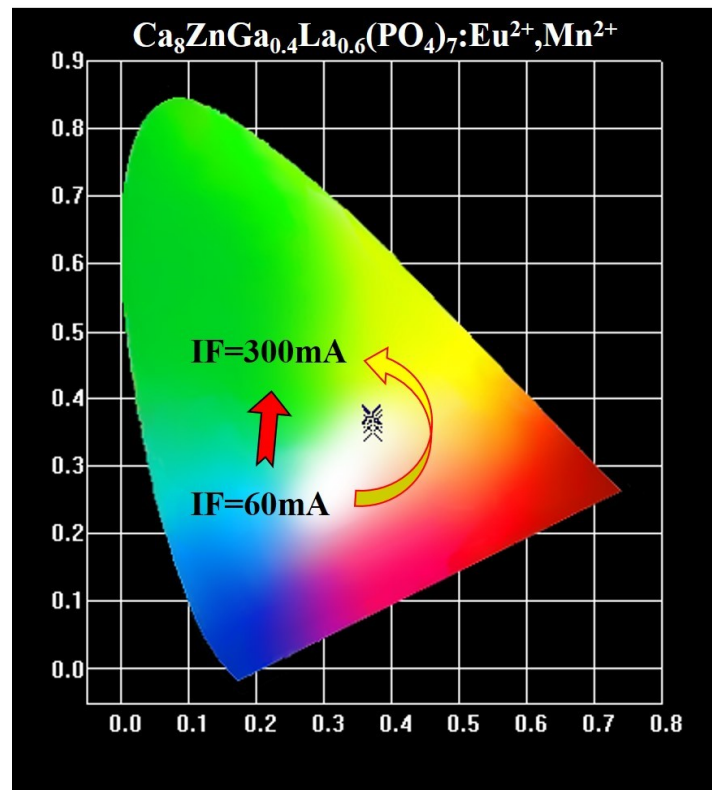

Figure S6. Color coordinates of WLED device under different operating currents.
